# Supplementary material
Source: PubMed Central journal article supplement (PMC3951583)
Supplement: NIHMS555531-supplement-01.pdf [file NIHMS555531-supplement-01.pdf]

595 **Supplementary Table 1 Adjusted<sup>a</sup> baseline regional brain volumes and annual**  
 596 **rates of change in extratemporal regional brain volumes according to hearing**  
 597 **status**  
 598

|                     | Baseline Volume (cm <sup>3</sup> ) <sup>b</sup> |                                 | Annual Rate of Change (cm <sup>3</sup> /year) |                                       |                                      | Effect Size <sup>d</sup> |
|---------------------|-------------------------------------------------|---------------------------------|-----------------------------------------------|---------------------------------------|--------------------------------------|--------------------------|
|                     | Normal Hearing Mean (95%CI)                     | Hearing Impairment Mean (95%CI) | Normal Hearing Mean (95%CI)                   | Hearing Impairment Mean (95%CI)       | Difference <sup>c</sup> Mean (95%CI) |                          |
| <b>Frontal</b>      |                                                 |                                 |                                               |                                       |                                      |                          |
| Superior            | 19.0<br>(18.4 – 19.64)                          | 18.8<br>(18.0 – 19.5)           | -0.11<br>(-0.15 - -0.06)**                    | -0.11<br>(-0.17 - -0.05)**            | -0.001<br>(-0.08 – 0.08)             | -0.01                    |
| Middle              | 39.3<br>(38.2 – 40.3)                           | 39.4<br>(38.1 – 40.7)           | -0.31<br>(-0.38 - -0.25)**                    | -0.37<br>(-0.46 - -0.28)**            | -0.06<br>(-0.17 - 0.05)              | -0.39                    |
| Inferior            | 20.9<br>(20.2 – 21.7)                           | 22.0<br>(21.1-22.9)             | -0.10<br>(-0.15 - -0.05)**                    | -0.17<br>(-0.24 - -0.10)**            | -0.07<br>(-0.16 - 0.02)              | -0.52                    |
| Medial              | 24.2<br>(23.6 – 24.9)                           | 25.1<br>(24.3 – 26.0)           | -0.10<br>(-0.14 - -0.06)**                    | -0.13<br>(-0.18 - -0.07)**            | -0.03<br>(-0.10 - 0.05)              | -0.24                    |
| Orbitofrontal       | 24.1<br>(23.4 – 24.8)                           | 24.3<br>(23.4 – 25.2)           | -0.07<br>(-0.10 - -0.03)**                    | -0.09<br>(-0.14 - -0.05)**            | -0.03<br>(-0.08 - 0.03)              | -0.35                    |
| <b>Sensorimotor</b> |                                                 |                                 |                                               |                                       |                                      |                          |
| Precentral          | 27.5<br>(26.7 – 28.2)                           | 27.3<br>(26.3 – 28.2)           | -0.22<br>(-0.28 - -0.16)**                    | -0.27<br>(-0.35 - -0.19)**            | -0.05<br>(-0.16 - 0.05)              | -0.33                    |
| Postcentral         | 21.0<br>(20.3 – 21.7)                           | 21.4<br>(20.6 – 22.2)           | -0.20<br>(-0.25 - -0.14)**                    | -0.28<br>(-0.35 - -0.21)**            | -0.08<br>(-0.18 - 0.01)              | -0.59                    |
| <b>Parietal</b>     |                                                 |                                 |                                               |                                       |                                      |                          |
| Superior            | 30.2<br>(29.3 – 31.1)                           | 30.2<br>(29.1 – 31.3)           | -0.28<br>(-0.32 - -0.23)**                    | -0.19<br>(-0.25 - -0.13)**            | 0.09<br>(0.01 – 0.17) <sup>+</sup>   | 0.88                     |
| Supramarginal       | 11.1<br>(10.7 – 11.6)                           | 10.9<br>(10.3 – 11.5)           | -0.11<br>(-0.14 - -0.08)**                    | -0.10<br>(-0.14 - -0.06)**            | 0.01<br>(-0.04 – 0.06)               | 0.13                     |
| Angular gyrus       | 17.8<br>(17.1 – 18.6)                           | 18.4<br>(17.5 – 19.3)           | -0.12<br>(-0.16 - -0.08)**                    | -0.15<br>(-0.20 - -0.10)**            | -0.03<br>(-0.10 – 0.03)              | -0.44                    |
| <b>Occipital</b>    |                                                 |                                 |                                               |                                       |                                      |                          |
| Superior gyrus      | 11.0<br>(10.6 – 11.4)                           | 10.5<br>(9.9 – 11.1)            | -0.11<br>(-0.14 - -0.09)**                    | -0.08<br>(-0.12 - -0.05)**            | 0.03<br>(-0.01 - 0.08)               | 0.61                     |
| Middle              | 10.8<br>(10.4 – 11.3)                           | 10.9<br>(10.4 – 11.5)           | -0.08<br>(-0.11 - -0.05)**                    | -0.07<br>(-0.11 - -0.03) <sup>+</sup> | 0.01<br>(-0.05 - 0.07)               | 0.11                     |
| Inferior            | 6.02<br>(5.77 – 6.27)                           | 6.00<br>(5.66 – 6.29)           | -0.03<br>(-0.05 – 0.0) <sup>+</sup>           | -0.05<br>(-0.07 - -0.02) <sup>+</sup> | -0.02<br>(-0.06 - 0.02)              | -0.49                    |
| Occipitotemporal    | 32.6                                            | 32.5                            | -0.05                                         | -0.07                                 | -0.02                                | -0.19                    |

|                      |                          |                       |                                        |                                        |                                           |       |
|----------------------|--------------------------|-----------------------|----------------------------------------|----------------------------------------|-------------------------------------------|-------|
|                      | (31.6 – 33.5)            | (31.3 – 33.6)         | (-0.10 – 0.00) <sup>+</sup>            | (-0.14 - -0.01) <sup>+</sup>           | (-0.11 - 0.06)                            |       |
| Occipital pole       | 6.79<br>(6.53 – 7.05)    | 6.6<br>(6.3 – 7.0)    | -0.08<br>(-0.09 - -0.06) <sup>**</sup> | -0.06<br>(-0.08 - -0.03) <sup>**</sup> | 0.02<br>(-0.01 - 0.05)                    | 0.90  |
| <b>Other regions</b> |                          |                       |                                        |                                        |                                           |       |
| Cingulate gyrus      | 24.0<br>(23.3 – 24.8)    | 24.2<br>(23.3 – 25.2) | -0.19<br>(-0.23 - -0.15) <sup>**</sup> | -0.28<br>(-0.33 - -0.22) <sup>**</sup> | -0.09<br>(-0.16 - -0.01) <sup>+</sup>     | -0.72 |
| Insula               | 15.2<br>(14.7 – 15.6)    | 15.5<br>(15.0 – 16.1) | 0.01<br>(-0.02 – 0.04)                 | -0.02<br>(-0.06 – 0.02)                | <b>p = .02</b><br>-0.03<br>(-0.08 - 0.02) | -0.53 |
| Precuneus            | 5.32<br>(5.11 – 5.54)    | 5.52<br>(5.24 – 5.80) | -0.03<br>(-0.04 - -0.02) <sup>**</sup> | -0.05<br>(-0.06 - -0.03) <sup>**</sup> | -0.02<br>(-0.04 – 0.004)                  | -0.72 |
| Cuneus               | 81.3<br>(78.0 – 84.5)    | 76.5<br>(72.4 – 80.6) | -0.85<br>(-1.07 - -0.63) <sup>**</sup> | -0.55<br>(-0.84 - -0.25) <sup>**</sup> | 0.30<br>(-0.08 - 0.69)                    | 0.63  |
|                      | <b>p</b><br><b>=0.03</b> |                       |                                        |                                        |                                           |       |

599

600 Statistical significance: + p &lt; .05, \* p &lt; .01, \*\* p &lt; .001

601

602 Abbreviations: vCSF = ventricular CSF

603

604 <sup>a</sup> All models included covariates of ICV, sex, baseline age, hypertension, smoking,  
605 hearing impairment, time (years of follow-up from baseline), and two-way interactions of  
606 time with hearing impairment, age, and sex.

607

608 <sup>b</sup> There were no significant differences in baseline regional brain volumes between  
609 individuals with normal hearing and hearing impairment except for cuneus.

610

611 <sup>c</sup> Difference is the (rate of change in hearing impairment) - (rate of change in normal  
612 hearing). Therefore, negative values indicate greater annual rates of atrophy in  
613 individuals with hearing impairment compared to those with normal hearing.

614

615 <sup>d</sup> Effect size is calculated as the difference in rates of change between those with  
616 hearing impairment and normal hearing divided by the corresponding standard deviation  
617 of the rate of change.

618

619

620

621
