# Supplementary material
Source: PubMed Central journal article supplement (PMC3951583)
Supplement: NIHMS555531-supplement-02.pdf [file NIHMS555531-supplement-02.pdf]

622 **Supplementary Table 2. Peak MNI coordinates from the voxel-based analysis of**  
 623 **regions showing significant associations between hearing impairment and rates**  
 624 **of change in brain volume**  
 625

| <b>Region</b>  | <b>Brodmann</b> |          |          |          |          | <b>No. of voxels</b> |
|----------------|-----------------|----------|----------|----------|----------|----------------------|
|                | <b>Area</b>     | <b>x</b> | <b>y</b> | <b>z</b> | <b>t</b> |                      |
| R Precentral   | 44              | 44       | 8        | 30       | -4.69    | 117                  |
| R Sup Temporal | 22              | 60       | -10      | -4       | -4.15    | 117                  |
| R Hippocampus  | 28              | 22       | -8       | -14      | -4.26    | 86                   |
| R Ant. Insula  | 47              | 42       | 20       | -2       | -4.05    | 75                   |
| R Post. Insula | 48              | 48       | 2        | -6       | -3.99    | 85                   |
| R Mid Temporal | 20              | 58       | -18      | -16      | -3.96    | 85                   |
| L Mid Cingulum | 23              | -8       | -26      | 46       | -3.93    | 70                   |

626  
 627  
 628
